# Supplementary figures and images for: Interferon-Alpha Decreases Cancer Stem Cell Properties and Modulates Exosomes in Malignant Melanoma
Source: MDPI journal article supplement (doi:10.3390/cancers15143666), 2023-07-18

SAMD9L

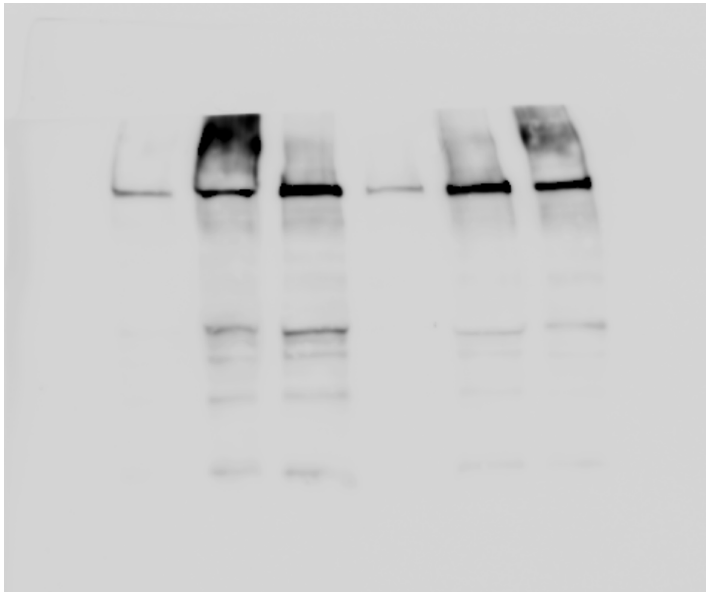

CD133

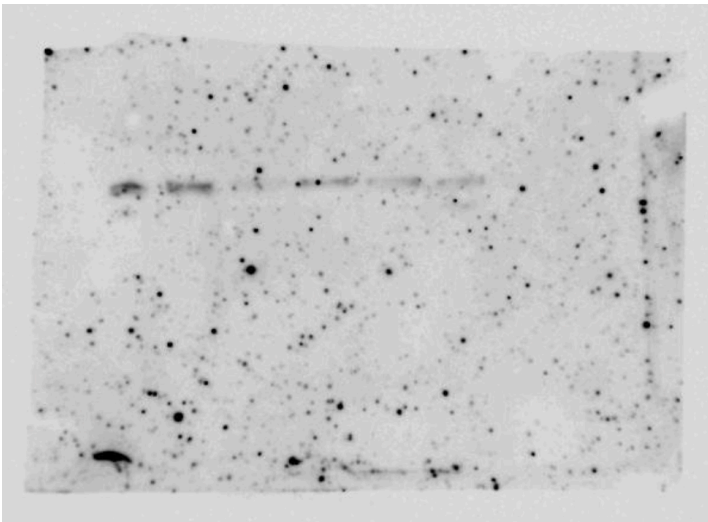

**Figure S2**

PKR

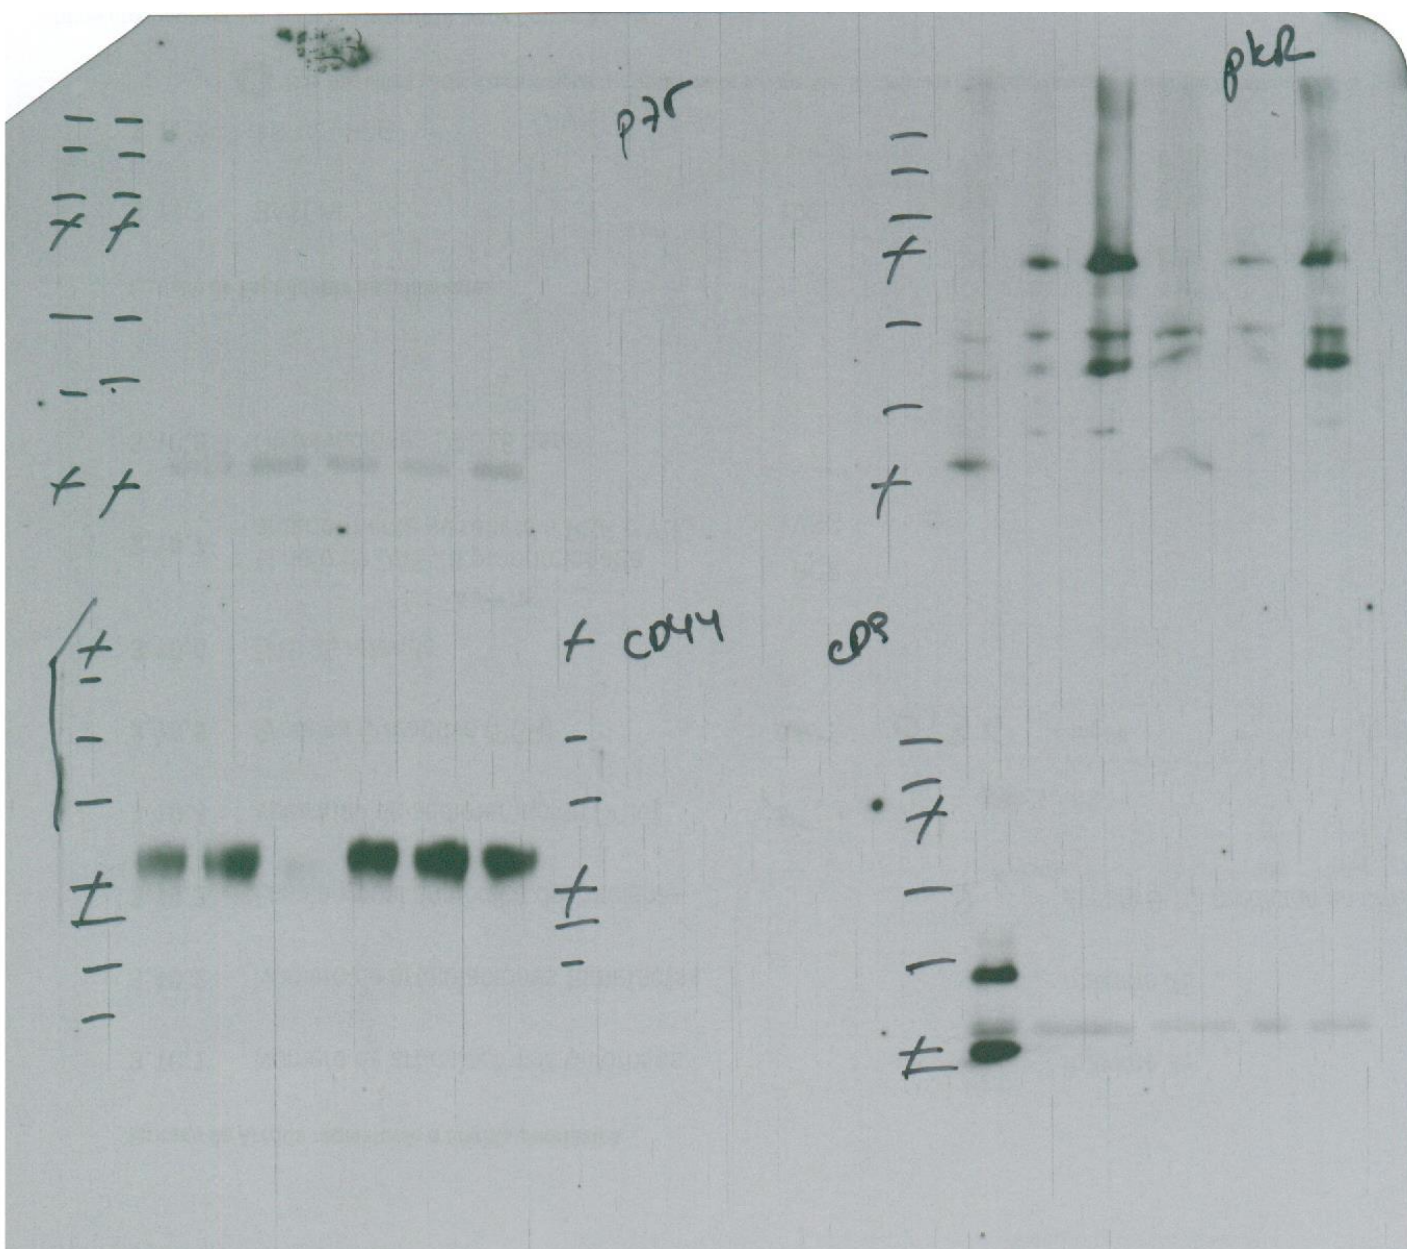

CD44

Figure S2

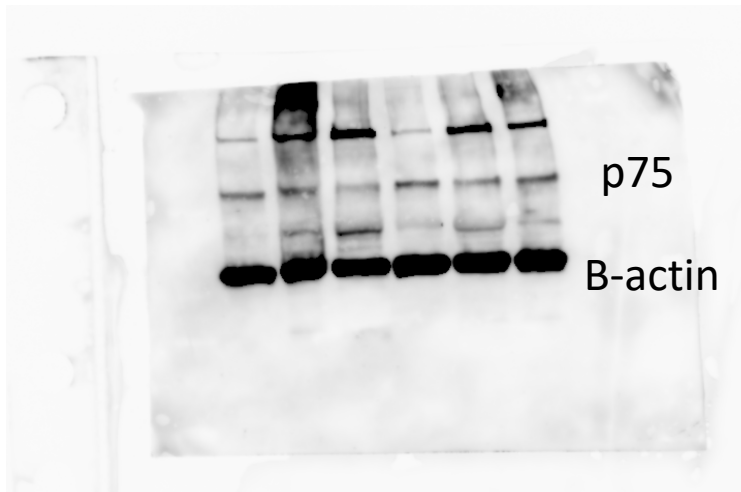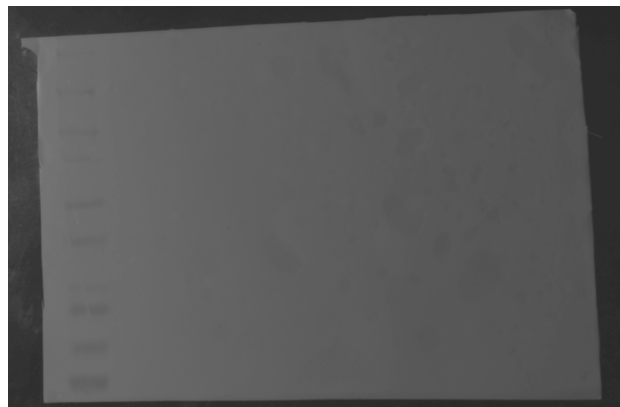

standar  
weight

**Figure S2**

Alix

GADPH

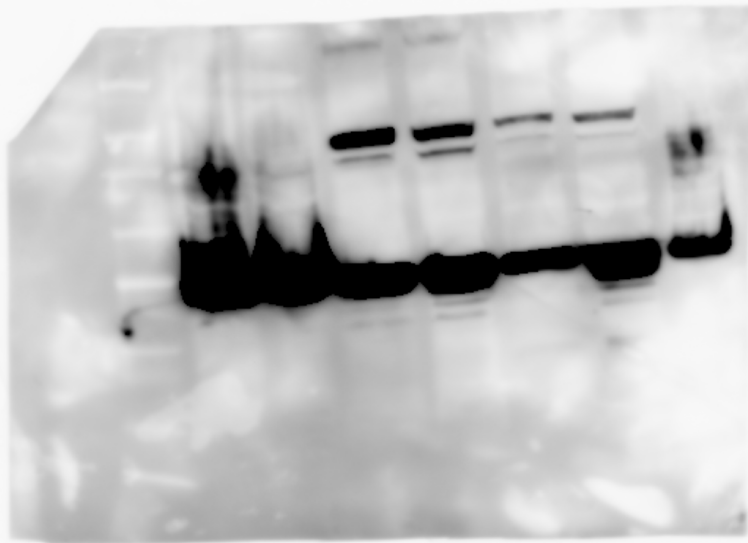

CD63

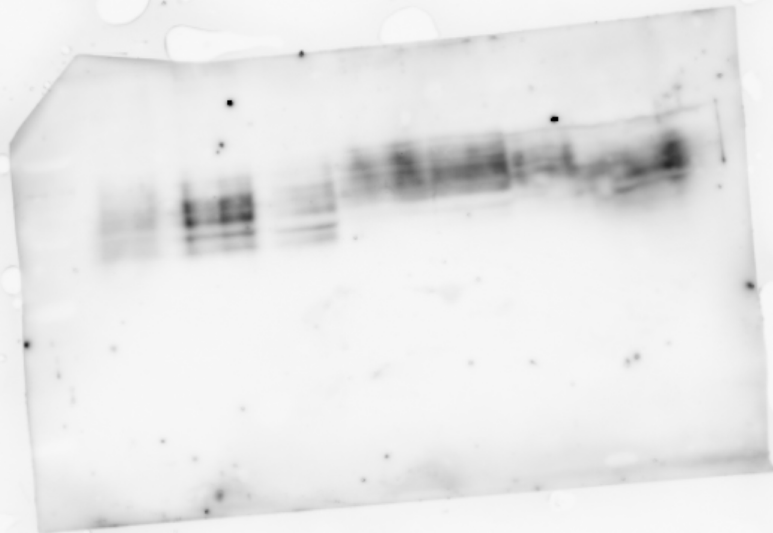

**Figure 5**

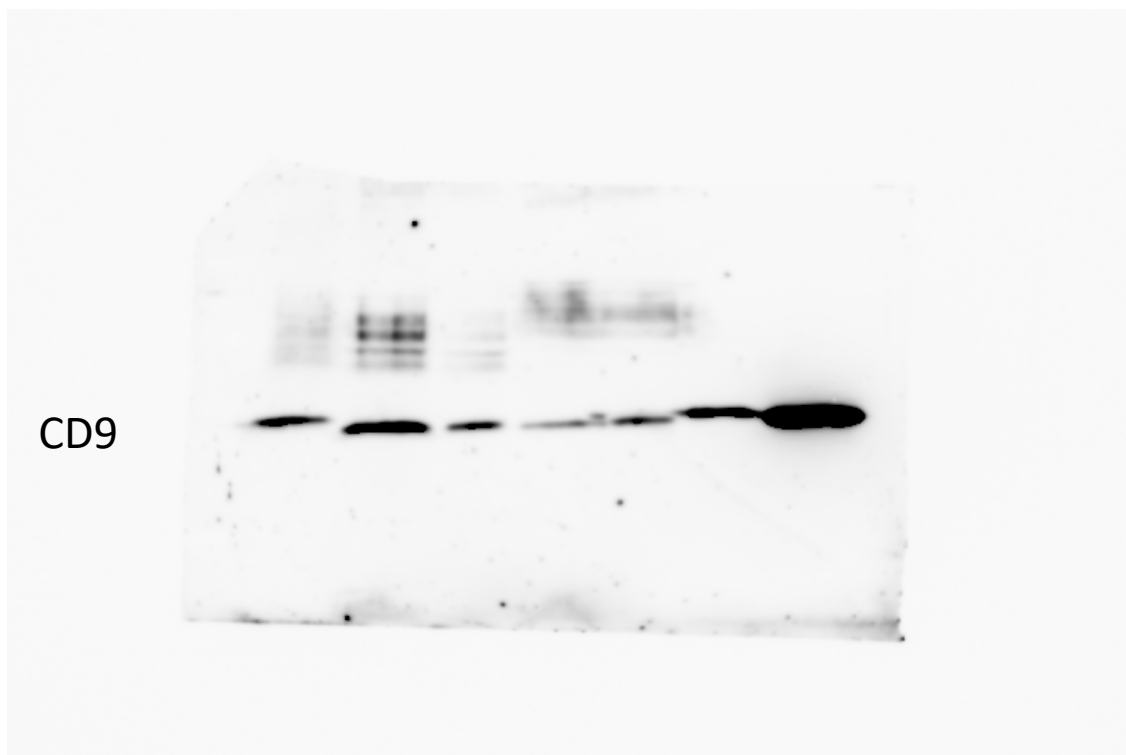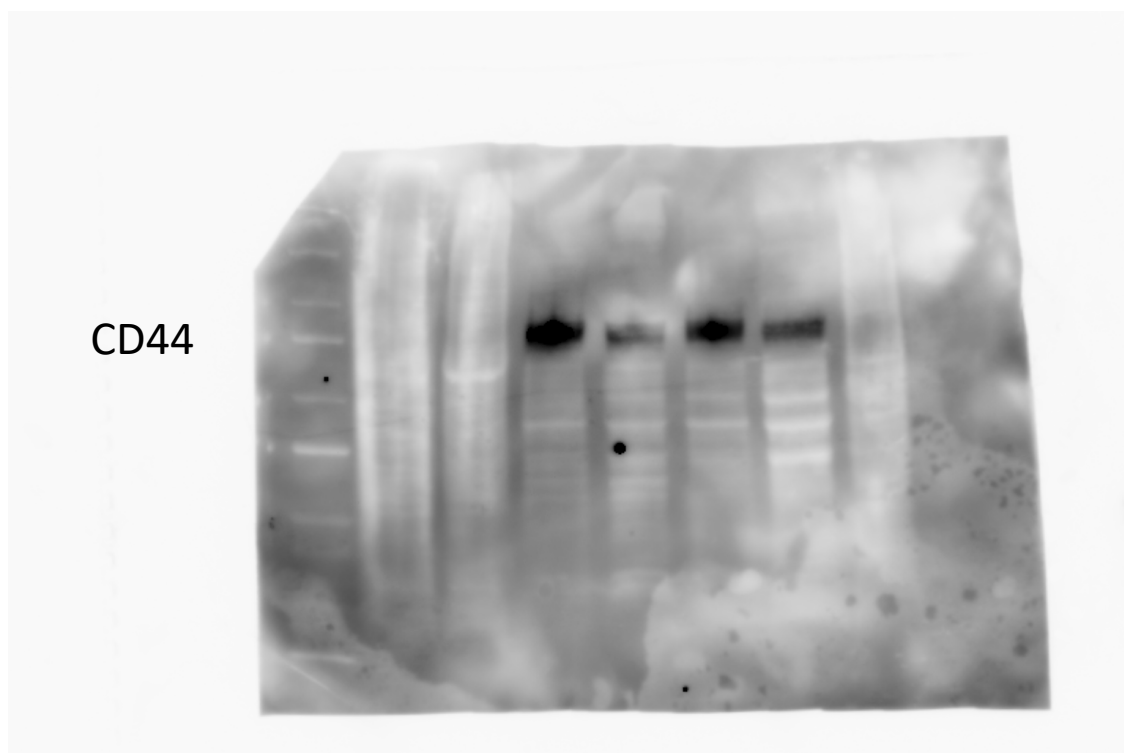

**Figure 5**

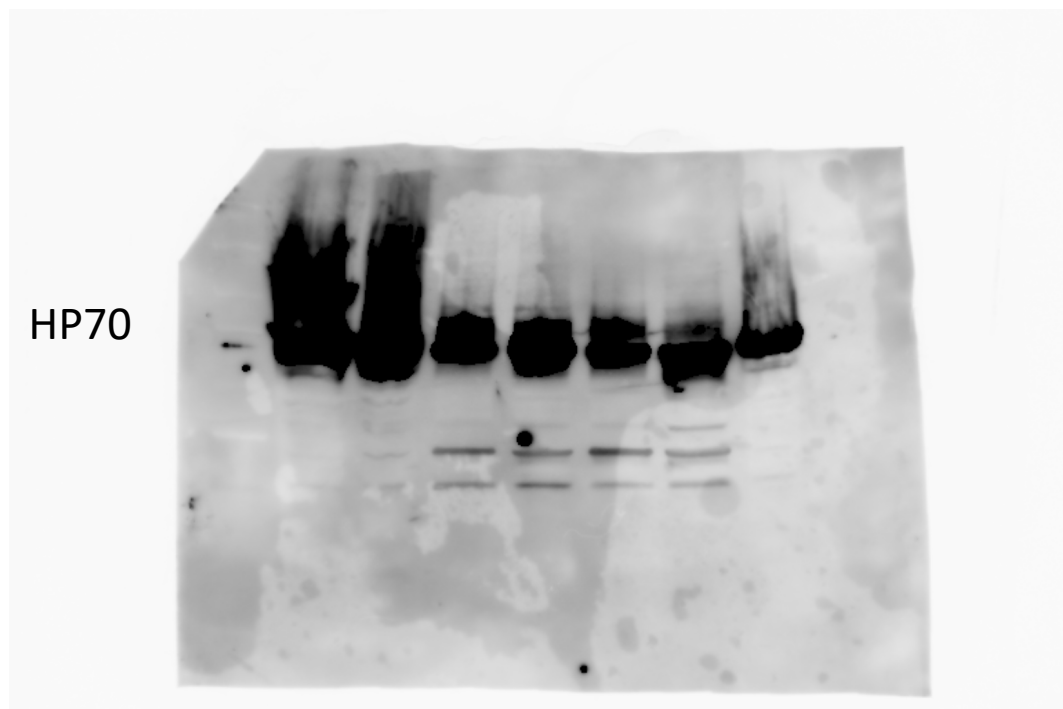

**Figure 5**

Supplement: s1 [file s1]
